# Supplementary material
Source: publisher site journal article supplement (https://www.dovepress.com/article/354347)
Supplement: Supplementary file 1 [file get_supplementary_file.php]

Supplemental Table 1 Characteristics of AP patients with MDRO infection

| Item | Category | Number of cases | Constituent ratio |
| --- | --- | --- | --- |
| Specimen source | Sputum | 341 | 53.20% |
|  | Peritoneal drainage fluid | 211 | 32.92% |
|  | Blood | 62 | 9.67% |
|  | Urine | 12 | 1.87% |
|  | Other | 15 | 2.34% |
| Type of MDROs | CRAB | 400 | 62.40% |
|  | CRKP | 121 | 18.88% |
|  | CRPA | 65 | 10.14% |
|  | MRSA | 19 | 2.96% |
|  | CRE | 22 | 3.43% |
|  | VRE | 14 | 2.18% |
| MDROs infection pathway, n (%) | Nosocomial infection | 436 | 68.02% |
|  | External hospital infection | 205 | 31.98% |
| Use of antibiotics before MDROs infection in the hospital, n (%) |  | 364 | 83.49% |

**(**The category of peritoneal drainage fluid included pancreatic necrotic tissue; CRAB=*carbapenem-resistant* *Acinetobacter baumannii;* CRPA=*carbapenem-resistant Klebsiella pneumoniae;* CRPA=*carbapenem-resistant Pseudomonas aeruginosa;* MRSA=*methicillin-resistant* *Staphylococcus aureus;* CRE=*carbapenem-resistant Enterobacteriaceae;* VRE=*vancomycin-resistant Enterococcus*)
